# Supplementary material for: A composition-controlled cross-linking resin network through rapid visible-light photo-copolymerization
Source: Royal Society of Chemistry journal article supplement (doi:10.1039/c6py00606j), 2016-01-01
Supplement: c6py00606j1.pdf [file c6py00606j1.pdf]

## SUPPLEMENTARY INFORMATION

### **A composition-controlled cross-linking resin network through rapid visible-light photo-copolymerization**

*Yin Yang,<sup>a</sup> Aaron Urbas,<sup>b</sup> Andres Gonzalez-Bonet,<sup>a</sup> Richard J. Sheridan,<sup>c</sup> Jonathan Seppala,<sup>c</sup> Kathryn L. Beers,<sup>c</sup> and Jirun Sun<sup>\*a</sup>*

- a) Dr. Anthony Volpe Research Center, American Dental Association Foundation, National Institute of Standards and Technology, Gaithersburg, MD 20899, USA
- b) Biosystems and Biomaterials Division, Materials and Measurement Laboratory, National Institute of Standards and Technology, Gaithersburg, MD 20899, USA
- c) Materials Science and Engineering Division, Materials and Measurement Laboratory, National Institute of Standards and Technology, Gaithersburg, MD 20899, USA

#### **Corresponding Author**

\*Dr. Jirun Sun, 100 Bureau Drive, Stop 8546, Gaithersburg, MD 20899-8546 USA. Phone: (+1) 301-975-5439. Fax: (+1) 301-963-9143. E-mail: [jsun@nist.gov](mailto:jsun@nist.gov).

**Contents:**

- 1. Chemical structure of monomers and initiators**
- 2. Additional figures for Raman micro-spectroscopy**
- 3. NMR spectra of monomer mixtures at different mole ratios**
- 4. FTIR spectra of monomer mixtures before and after polymerization**

**1. Chemical structure of monomers and initiators**

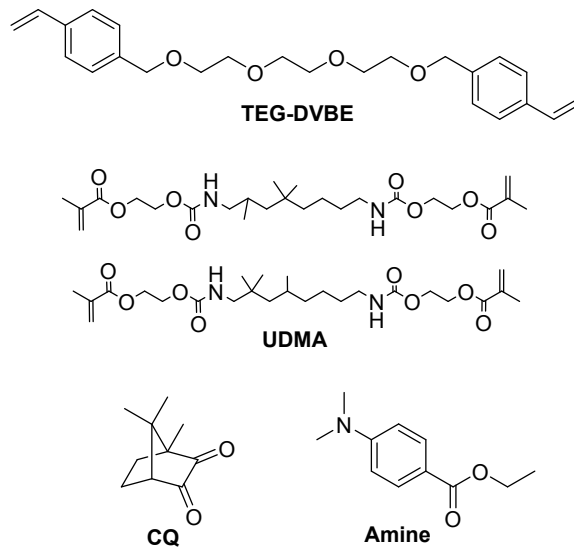

**Figure S1.** Chemical structure of monomers and initiators used in this paper.

## 2. Additional figures for real-time Raman micro-spectroscopy

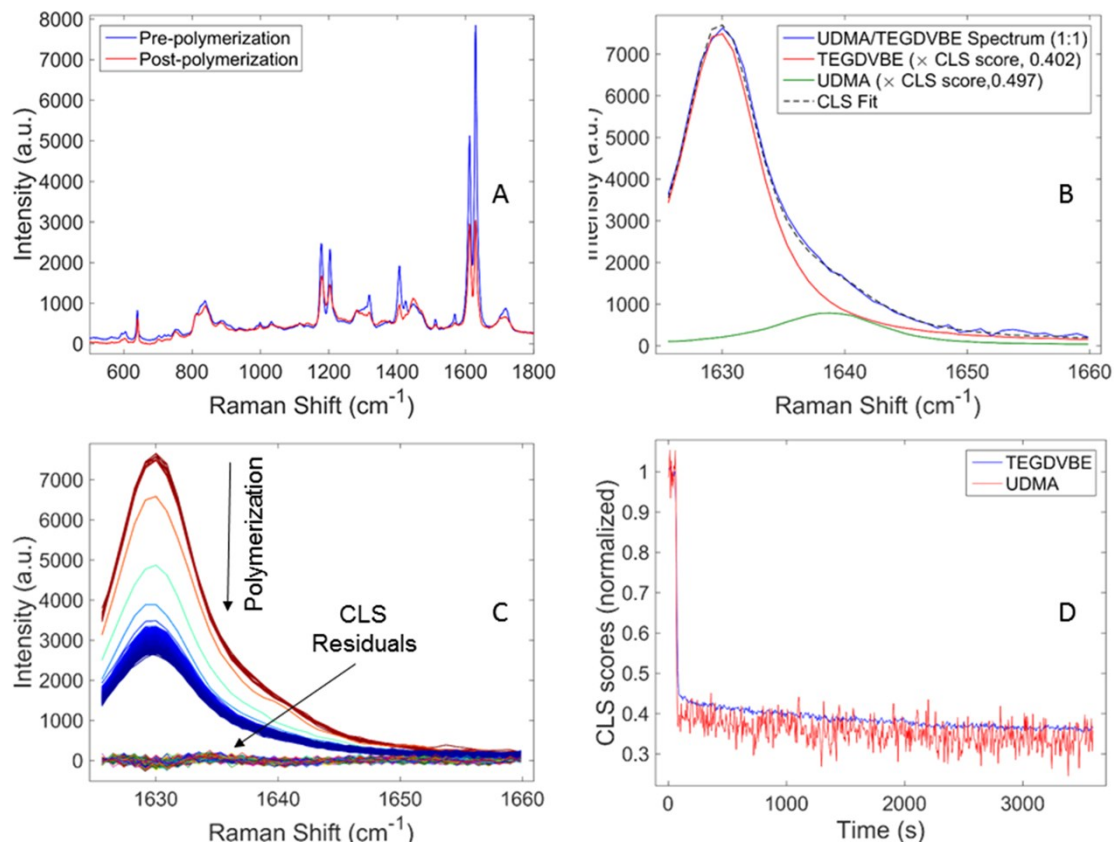

**Figure S2.** Example of CLS analysis of Raman spectra for estimating DC for the polymerization of a 1:1 TEG-DVBE/UDMA sample. Panel A shows Raman spectra of the 1:1 TEG-DVBE/UDMA monomer blend and copolymer. Panel B shows an example of the pure spectra fit using CLS to a sample Raman spectrum. Panel C shows Raman spectra, truncated to the spectral region used for CLS fitting, for a complete polymerization data set together with the fit residuals. Panel D shows the corresponding normalized CLS score profiles for data set as a function of time.

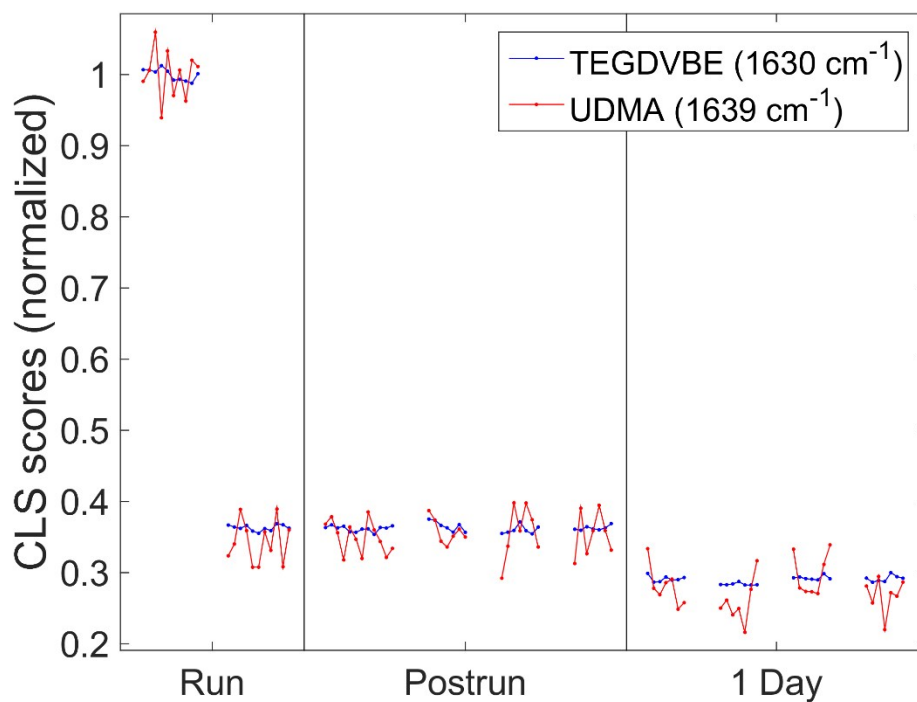

**Figure S3.** Additional CLS scores for the 1:1 TEG-DVBE/UDMA sample data presented in Figure 3B. The “Run” data correspond to spectra collected prior to and 60 min after polymer photo-initiation. The “Postrun” data correspond to Raman spectra collected immediately following the 60 min continuous acquisition following photo-initiation. The spectra were acquired from 4 different locations (corresponding to the 4 line segments in the graph) within the reaction chamber to verify that the degree of conversion was consistent throughout the sample. The “1 Day” data were collected similarly approximately 24 hours after polymerization was initiated.

### 3. NMR spectra of monomer mixtures.

The mole ratio of monomers was determined by integrating the vinyl peak of TEG-DVBE at 6.71 ppm and the C=C double bond at 6.13 ppm.

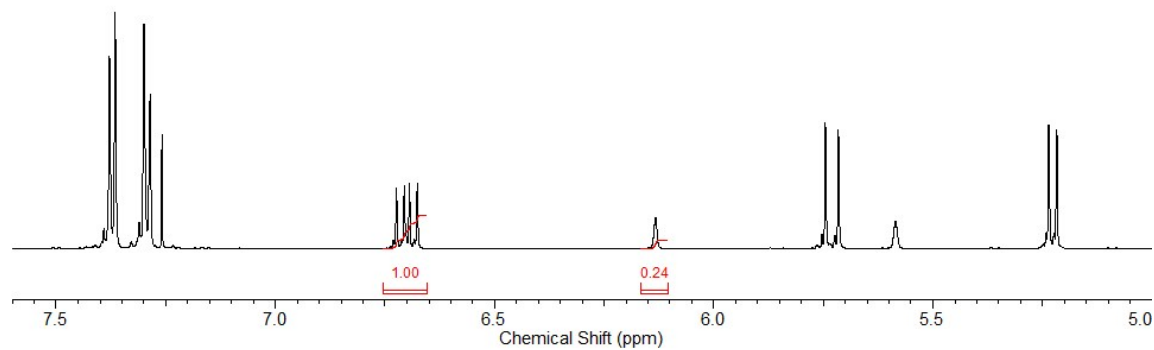

**Figure S4.** <sup>1</sup>H NMR spectrum of the mixture of UDMA and TEG-DVBE in 1:4 ratio in CDCl<sub>3</sub> at 298 K.

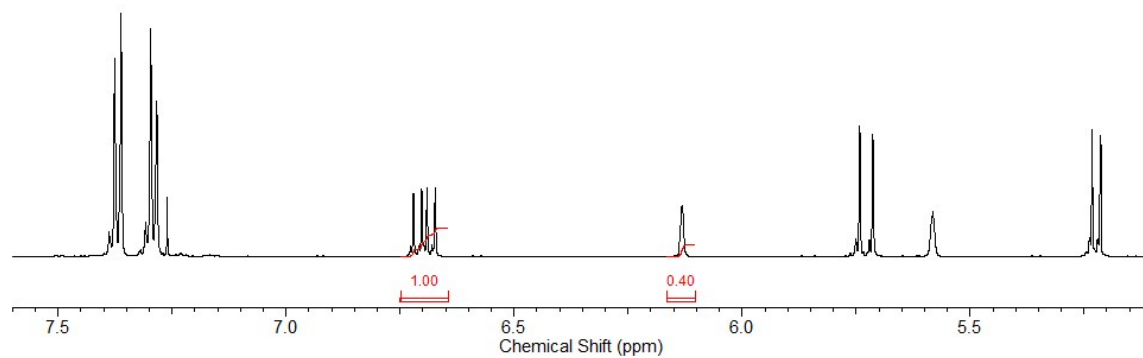

**Figure S5.** <sup>1</sup>H NMR spectrum of the mixture of UDMA and TEG-DVBE in 1:2.5 ratio in CDCl<sub>3</sub> at 298 K.

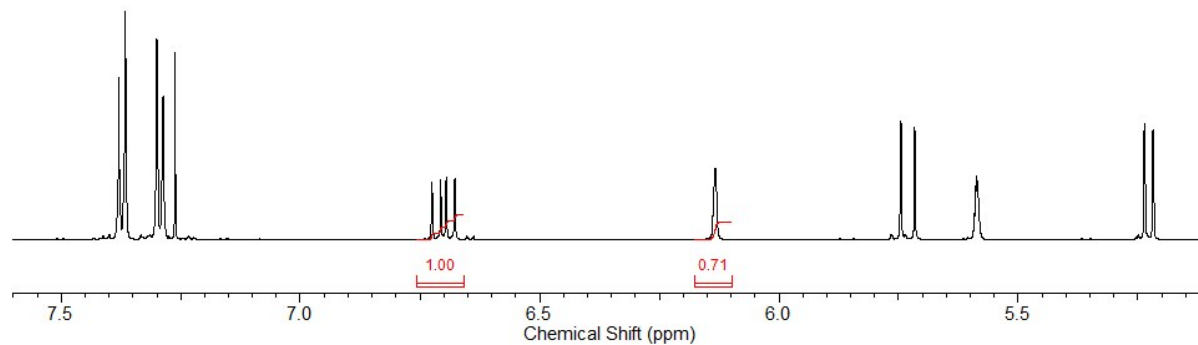

**Figure S6.** <sup>1</sup>H NMR spectrum of the mixture of UDMA and TEG-DVBE in 2:3 ratio in CDCl<sub>3</sub> at 298 K.

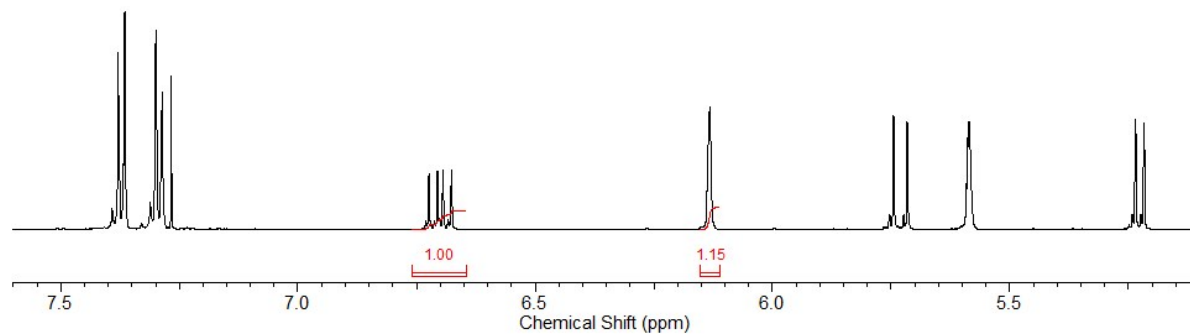

**Figure S7.**  $^1\text{H}$  NMR spectrum of the mixture of UDMA and TEG-DVBE in 1:1:1 ratio in  $\text{CDCl}_3$  at 298 K.

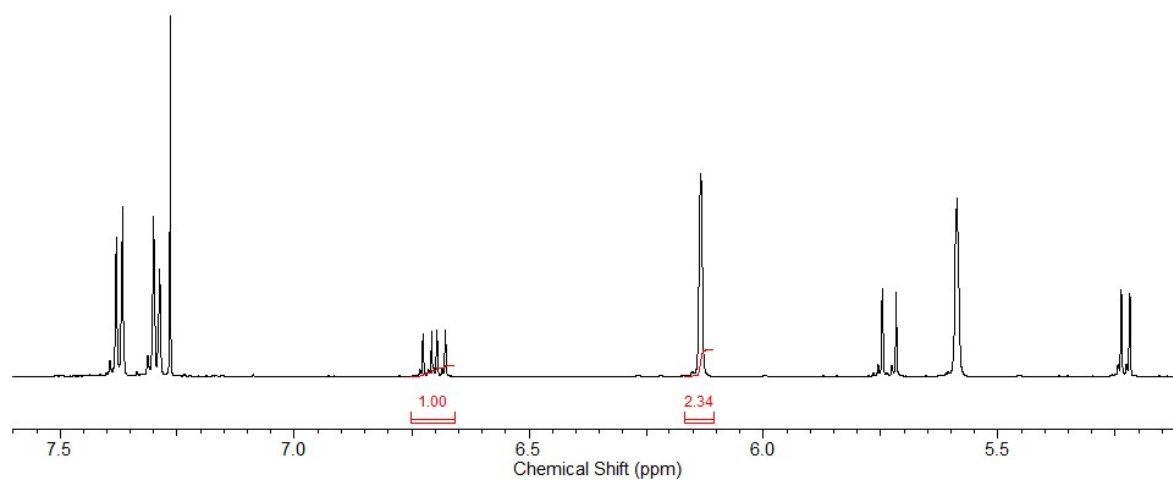

**Figure S8.**  $^1\text{H}$  NMR spectrum of the mixture of UDMA and TEG-DVBE in 2.3:1 ratio in  $\text{CDCl}_3$  at 298 K.

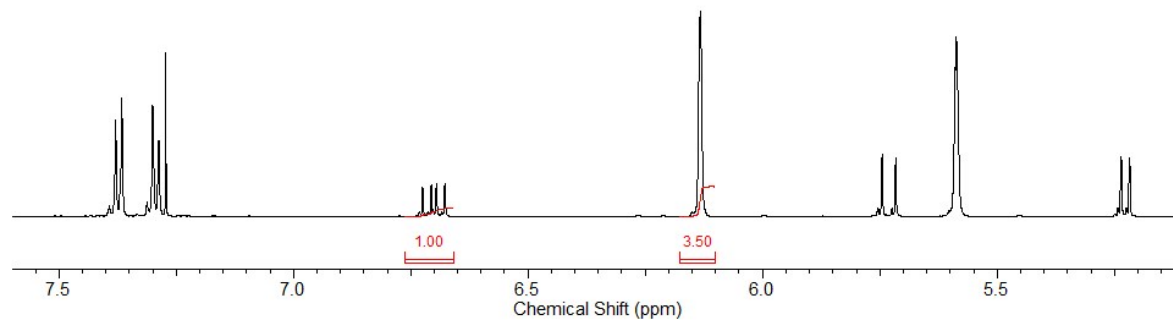

**Figure S9.**  $^1\text{H}$  NMR spectrum of the mixture of UDMA and TEG-DVBE in 3.5:1 ratio in  $\text{CDCl}_3$  at 298 K.

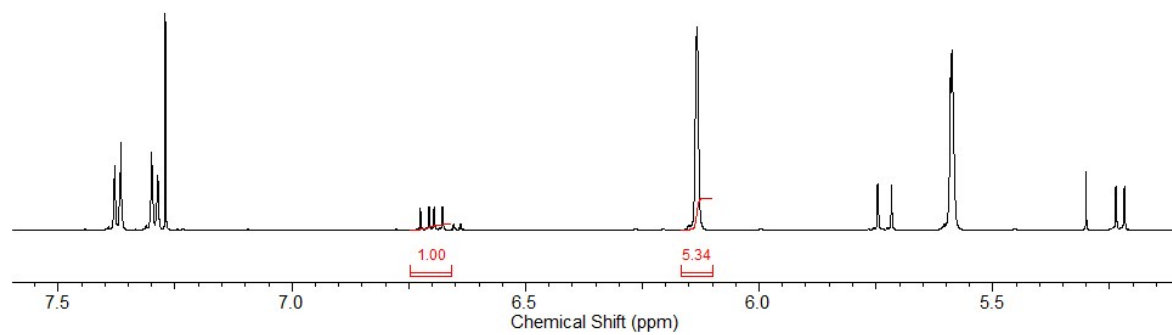

**Figure S10.** <sup>1</sup>H NMR spectrum of the mixture of UDMA and TEG-DVBE in 5.3:1 ratio in CDCl<sub>3</sub> at 298 K.

4. FTIR spectra of monomer mixtures before and after polymerization.

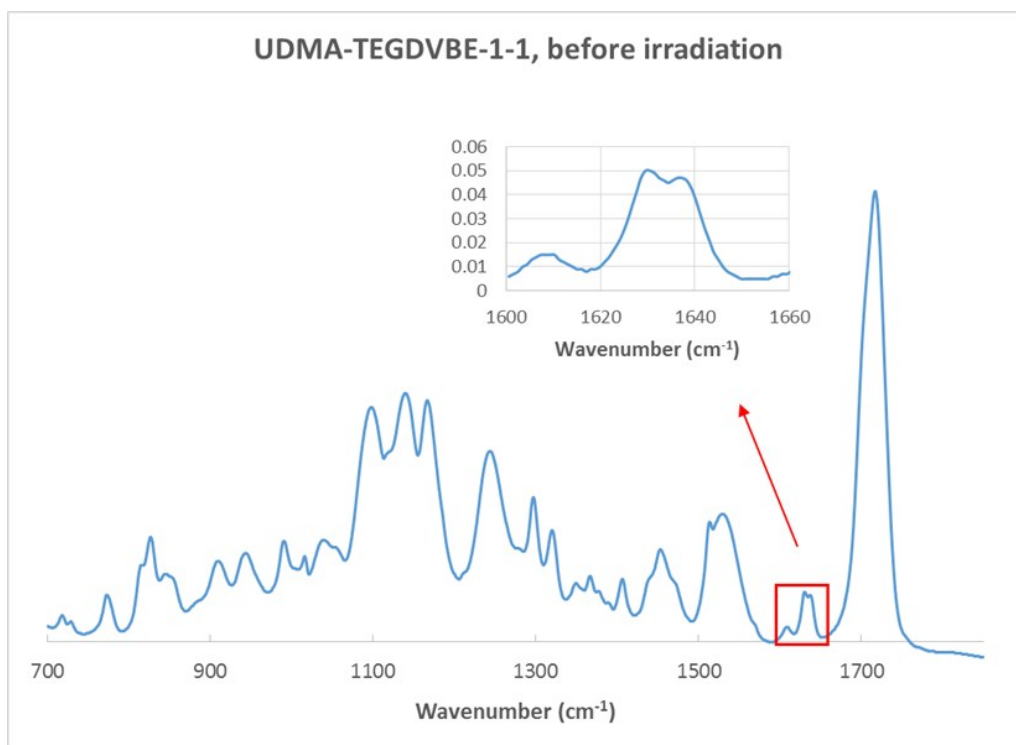

Figure S11. FTIR spectra of the mixture of UDMA and TEG-DVBE in 1:1 ratio before irradiation.

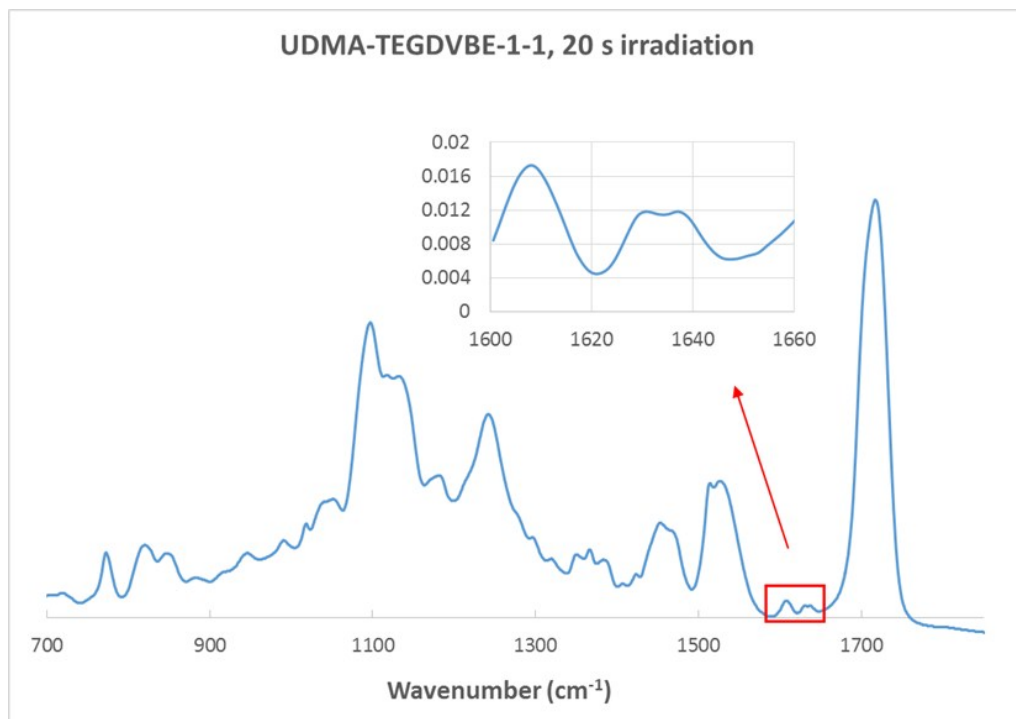

Figure S12. FTIR spectra of the mixture of UDMA and TEG-DVBE in 1:1 ratio collected right after 20 s irradiation.



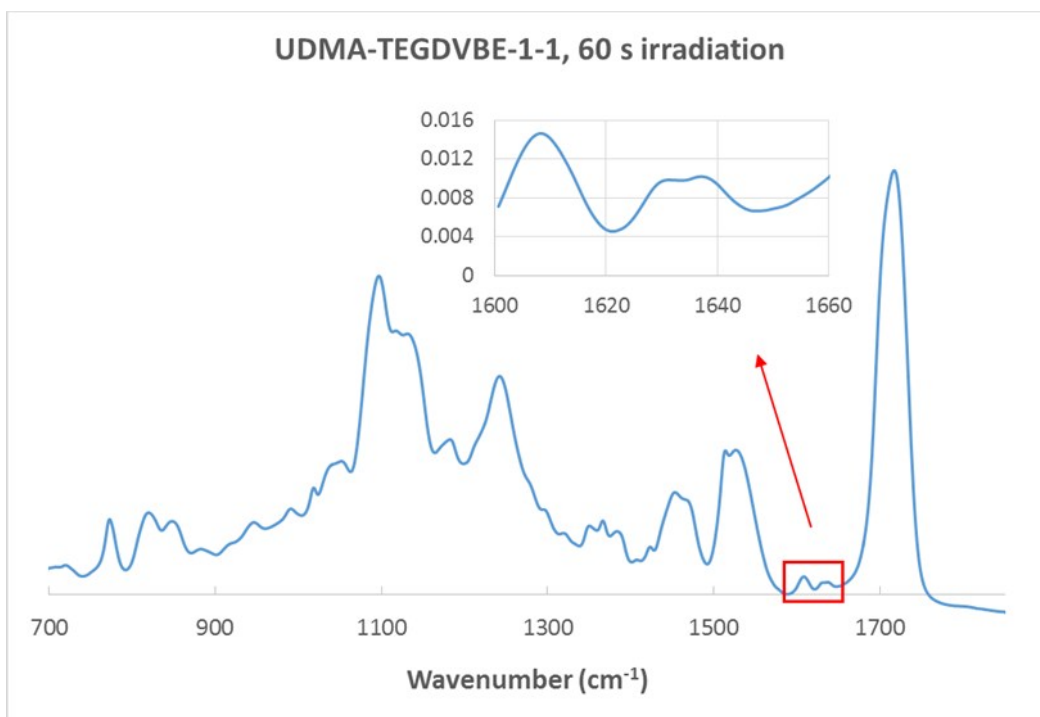

**Figure S13.** FTIR spectra of the mixture of UDMA and TEG-DVBE in 1:1 ratio collected right after 40 s irradiation.

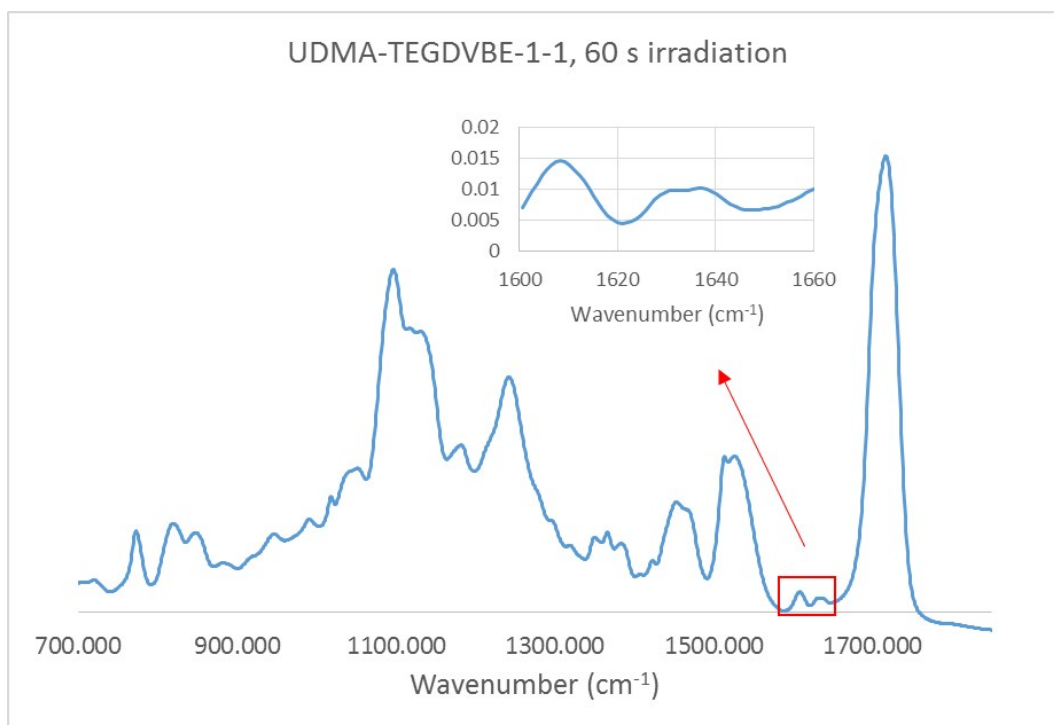

**Figure S14.** FTIR spectra of the mixture of UDMA and TEG-DVBE in 1:1 ratio collected right after 60 s irradiation.
